# Supplementary material for: Divergent changes in aerosol optical hygroscopicity and new particle formation induced by heatwaves
Source: Copernicus journal article supplement (doi:10.5194/egusphere-2024-3242), 2024-11-15
Supplement: Supplementary file 1 [file egusphere-2024-3242-supplement.pdf]

1 *Supporting Information for*

2 **Divergent changes in aerosol optical hygroscopicity and new**  
3 **particle formation induced by heatwaves**

4  
5 Yuhang Hao<sup>1, a</sup>, Peizhao Li<sup>1, a</sup>, Yafeng Gou<sup>1</sup>, Zhenshuai Wang<sup>1</sup>, Mi Tian<sup>1</sup>, Yang Chen<sup>2</sup>,  
6 Ye Kuang<sup>3</sup>, Hanbing Xu<sup>4</sup>, Fenglian Wan<sup>1</sup>, Yuqian Luo<sup>1</sup>, Wei Huang<sup>5</sup>, Jing Chen<sup>1, 6, \*</sup>  
7

8 <sup>1</sup> College of Environment and Ecology, Chongqing University, Chongqing 400045, China

9 <sup>2</sup> Center for the Atmospheric Environment Research, Chongqing Institute of Green and  
10 Intelligent Technology, Chinese Academy of Sciences, Chongqing 400714, China

11 <sup>3</sup> Institute for Environmental and Climate Research, Jinan University, Guangzhou 511443,  
12 China

13 <sup>4</sup> Experimental Teaching Center, Sun Yat-sen University, Guangzhou 510275, China

14 <sup>5</sup> National Meteorological Center, China Meteorological Administration, Beijing 100081,  
15 China

16 <sup>6</sup> Key Laboratory of Three Gorges Reservoir Region's Eco-Environment, Ministry of  
17 Education, Chongqing University, Chongqing 400045, China

18  
19 <sup>a</sup> These authors contributed equally  
20

21 *Correspondence to:* Jing Chen (chen.jing@cqu.edu.cn)

22  
23  
24  
25 **Contents of this file**

26  
27 Figures S1 to S11

28 Tables S1 to S2

29 References

30 **S1. Site description**

31 The observation site was located on the rooftop of a building (~15 m above the  
32 ground) in the main campus of Chongqing University (29.57°N, 106.46°E) in the urban  
33 center of Chongqing, southwest China. The site is characterized by a typical residential  
34 and commercial environment, mainly influenced by local emissions (e.g., traffic,  
35 cooking). All instruments were installed in an air-conditioned room, with the room  
36 temperature maintained about 25°C. The ambient air was sampled through a PM<sub>2.5</sub>  
37 impactor (model 2000-30EH, URG Inc.) and dried with a Nafion dryer (model MD-700,  
38 Perma Pure LLC), to achieve a low relative humidity level (RH <30%) prior to the online  
39 measurements. During the observation period, urban Chongqing suffered a rare heatwave.  
40 The mean temperature and relative humidity during the study period and the same period  
41 from 2011 to 2021 in urban Chongqing are given in Figure S1.

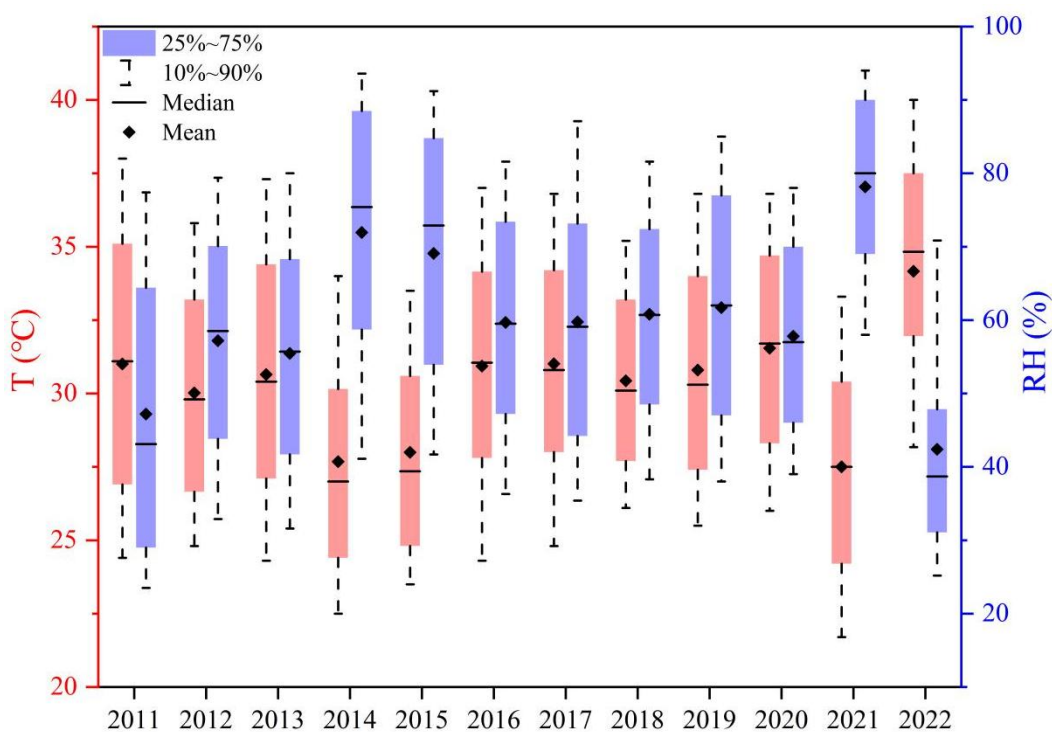

42

43 **Figure S1.** The variation trends of annual temperature and RH during the study period in  
44 2022 and the same period from 2011 to 2021 in urban Chongqing.

45 **S2. Derivation of aerosol liquid water content (ALWC)**

46 In this study, ALWC was determined as the discrepancy in aerosol volume  
47 concentration between the humidified and dry particles:

48 
$$ALWC = V_{dry} \times (f_v(RH) - 1) \quad (1)$$

49 where the dry aerosol volume concentration ( $V_{dry}$ ) was estimated with the dry  
50 scattering coefficient by a machine learning method. Given the dependence on aerosol  
51 hygroscopicity and size distribution, the aerosol volume growth factor ( $f_v(RH)$ ) can be  
52 obtained from the observed  $f(RH)$  and SAE (a proxy of aerosol size distribution) with the  
53 humidified nephelometer system (Kuang et al., 2018). Accordingly, the fraction of  
54 aerosol water content ( $f_w$ ) upon hydration could be expressed as:

55 
$$f_w = \frac{ALWC}{ALWC + V_{dry}} \quad (2)$$

56 Both dry and humidified nephelometers were calibrated before the measurement for  
57 the zero/span check with the particle-free air/standard gas (R134a), following standard  
58 calibration procedures. More detailed descriptions about the home-built humidified  
59 nephelometer system can refer to Kuang et al. (2017, 2020) and Xue et al. (2022).

### 60 **S3. Offline particle sampling and chemical analysis**

61 Total suspended particle (TSP) filter samples were collected by a moderate volume  
62 air sampler at a flow rate of 200 L/min from August 5 to 19, 2022. Daily (from 9:30 a.m.  
63 to 9:00 a.m. of the next day) integrated ambient TSP samples were collected on prebaked  
64 (600°C, 5h) quartz-fiber filters (90 mm, Whatman) for water-soluble ions, organic carbon  
65 (OC), and elemental carbon (EC) analysis.

66 Water-soluble inorganic anions (i.e.,  $\text{SO}_4^{2-}$ ,  $\text{NO}_3^-$ ,  $\text{Cl}^-$  and  $\text{F}^-$ ) and cations (i.e.,  $\text{NH}_4^+$ ,  
67  $\text{Na}^+$ ,  $\text{Mg}^{2+}$ ,  $\text{Ca}^{2+}$  and  $\text{K}^+$ ) were quantified using an ion chromatograph analyzer (Dionex  
68 600, Dionex, USA) following standard procedures (Peng et al., 2019; Wang et al., 2018).  
69 Elemental carbon (EC) and organic carbon (OC) in the collected TSP samples were  
70 analyzed using a DRI Model 2015 Multi-wavelength Carbon Analyzer (Magee Scientific,  
71 USA). The methodology for OC/EC analysis was based on the thermal-optical  
72 reflectance (TOR) method following the Interagency Monitoring of Protected Visual  
73 Environments (IMPROVE-A) protocol, as shown in Chow et al. (2007, 2011) and Peng  
74 et al. (2020). The secondary organic carbon (SOC) can be estimated with the obtained  
75 OC and EC data according to the EC-tracer method (Castro et al., 1999; Strader et al.,  
76 1999), details of which was also available in our previous study (Hao et al., 2024).

77 The chemical components mass concentration and mass fraction in TSP, as well as  
78 the  $\text{PM}_{2.5}$  ( $\text{PM}_{10}$ ) mass concentration and the ratio of SOC/TOC during the study period  
79 are depicted in Figure S2.

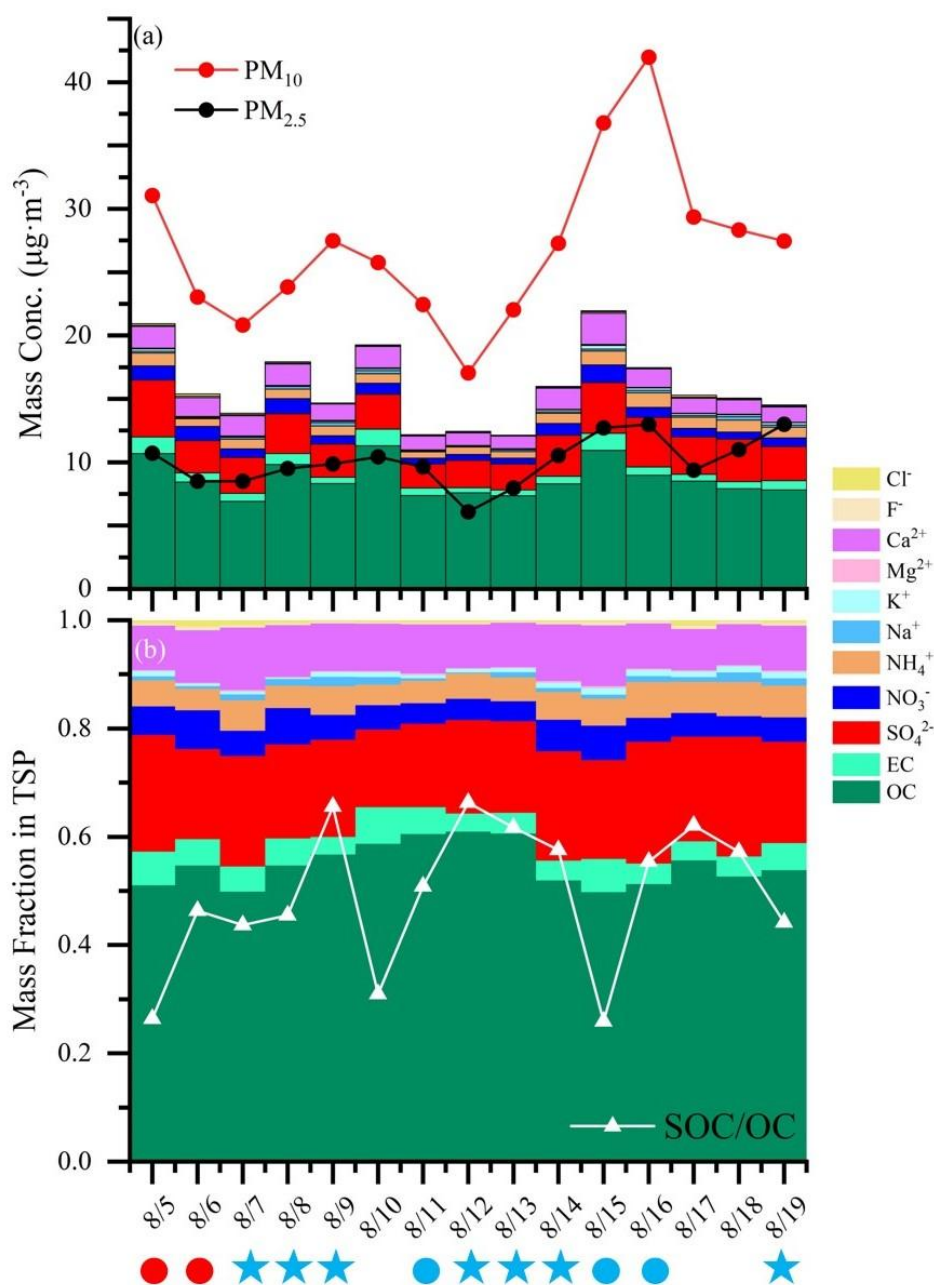

80  
 81 **Figure S2.** The mass concentration (a) and mass fraction (b) of chemical components in  
 82 TSP (total suspended particulates) during the study period. The red, black and white line  
 83 stands for  $\text{PM}_{10}$ ,  $\text{PM}_{2.5}$  and SOC/OC, respectively. The red or blue circle symbols below  
 84 specific dates represent the P1 or P2 non-event days, and the blue stars represent the P2  
 85 NPF days.

86 **S4. Meteorological and air quality data**

87 The contemporary hourly meteorological datasets including relative humidity  
88 (RH), temperature (T), visibility (VIS), wind speed (WS), wind direction (WD),  
89 precipitation, and the mixing layer height (MLH) were obtained from the Integrated  
90 Surface Database from the U.S. National Centers for Environmental Information  
91 (<https://ncdc.noaa.gov/isd>) (Wan et al., 2023; Xu et al., 2020). Ultraviolet (UV) radiation  
92 data were downloaded from European Centre for Medium-Range Weather Forecasts  
93 (<https://cds.climate.copernicus.eu/>).

94 Hourly air pollutant datasets including PM<sub>2.5</sub>, PM<sub>10</sub>, NO<sub>2</sub>, SO<sub>2</sub>, CO and O<sub>3</sub> were  
95 achieved from the China National Environmental Monitoring Center  
96 (<http://www.cnemc.cn/en>). The gas-phase sulfuric acid, known as the most ubiquitous  
97 and key precursor for NPF, was estimated with the UVB (UVB = 5%UV, Fitsiou et al.,  
98 2021) and SO<sub>2</sub> concentration (Lu et al., 2019):

99 
$$\text{H}_2\text{SO}_4 = 280.05 \times \text{UVB}^{0.14} \times \text{SO}_2^{0.40} \quad (3)$$

100 **S5. Particle number size distribution measurements**

101 During the field observation, every 3-min PNSD and particle volume size  
102 distribution (PVSD) within the diameter range of 14.1-710.5 nm was measured by a  
103 SMPS, which consisted of a neutralizer (model 3080, TSI Inc.), a differential mobility  
104 analyzer (model 3081, TSI Inc.), and a condensation particle counter (model 3775, TSI  
105 Inc.) (Dominick et al., 2018; Rissler et al., 2006).

106 The aerosol effective radius ( $R_{\text{eff}}$ ) is a crucial parameter regulating optical properties  
107 (e.g., light scattering) of the aerosol population (Hansen and Travis, 1974; Grainger et al.,  
108 1995). It can be calculated with the measured size distribution as below (Hansen and  
109 Travis, 1974; Grainger et al., 1995):

110 
$$R_{\text{eff}} = \frac{\int D_p^3 n(\log D_p) d\log D_p}{\int D_p^2 n(\log D_p) d\log D_p} \quad (4)$$

111 where  $n(\log D_p)$  is the particle number size distribution in log scale.

112 Using the measured PNSD data, NPF events were identified according to the criteria  
113 raised by Dal Maso et al. (2005), and the key parameters related to NPF events (e.g.,  
114 growth rate (GR) of new particles, condensation sink (CS) and coagulation sink (CoagS))  
115 could be derived following the methodologies introduced by Kulmala et al. (2012). The  
116 specific dates for NPF and non-event classifications were summarized in Table S1.

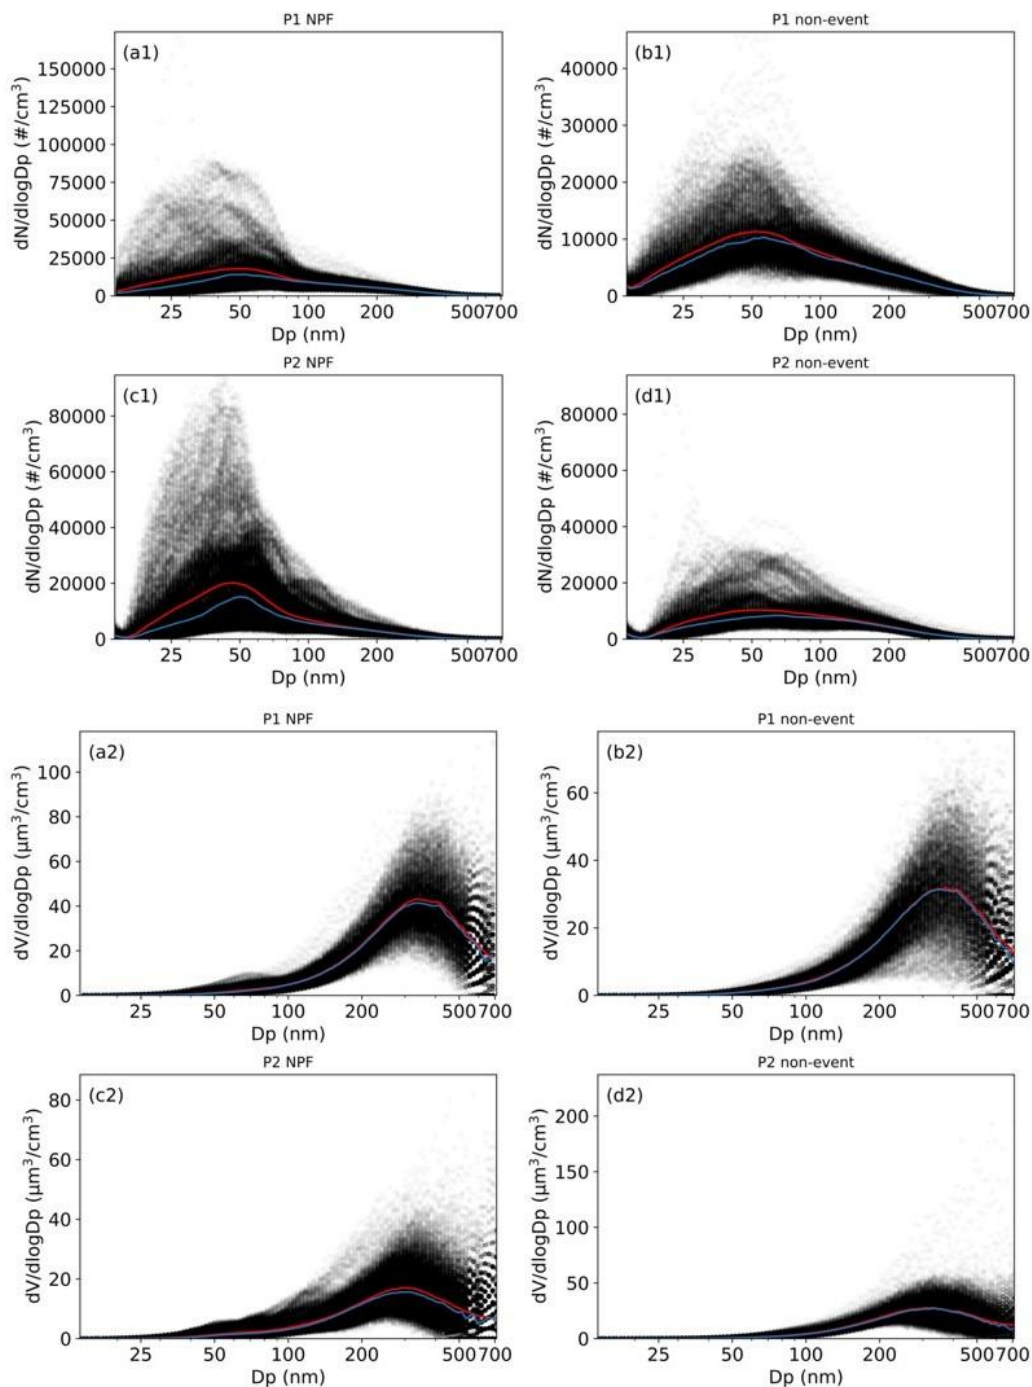

117

118 **Figure S3.** The PNSDs (a1-d1) and PVSDs (a2-d2) for different event categories. The  
 119 red and blue lines represent the mean and median values, respectively.

120

121 The PNSD is typically categorized into three modes: the nucleation mode ( $D_p < 25$   
 122 nm), Aitken mode (25-100 nm), and accumulation mode ( $D_p > 100$  nm) (Zhu et al., 2021).



123 The diurnal variations of aerosol number and volume concentrations, as well as  $R_{\text{eff}}$ , for  
 124 different modes on NPF event days are illustrated in Figure S4.

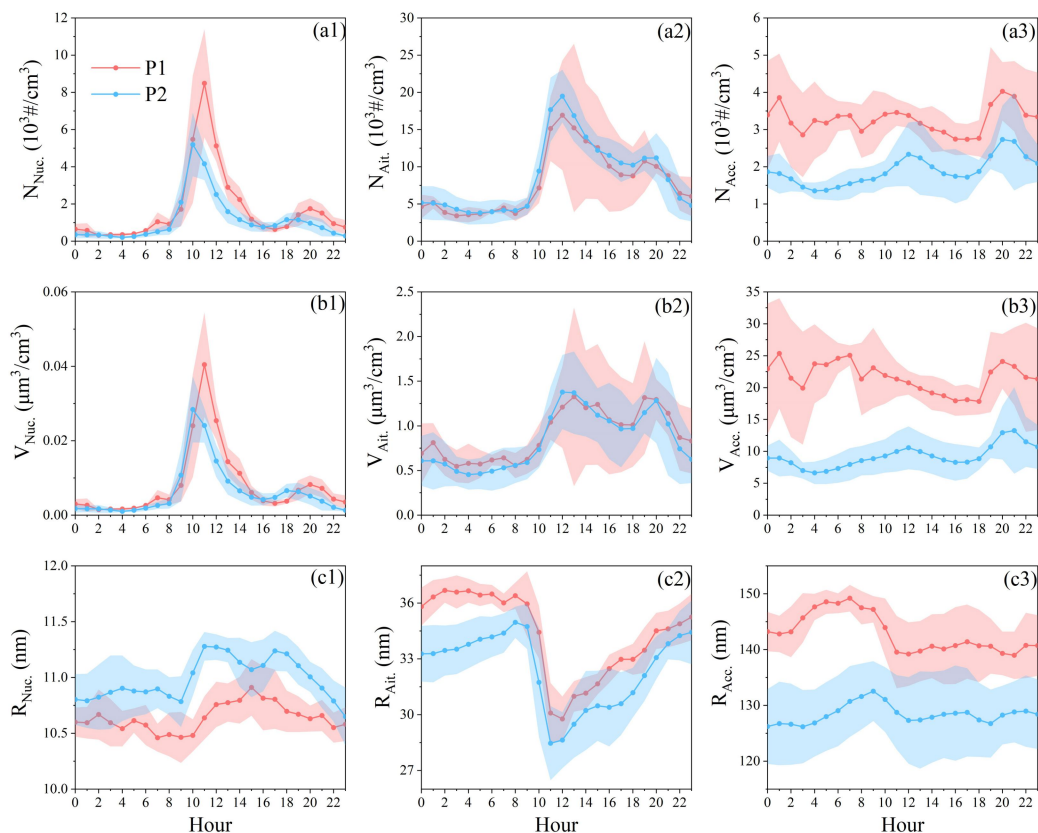

125  
 126 **Figure S4.** Diurnal variations of the number (a1-a3), volume (b1-b3) concentration and  
 127 effective radius (c1-c3) of nucleation mode (left column), Aitken mode (middle column),  
 128 and accumulation mode (right column) particles on NPF event days during P1 (red line)  
 129 and P2 (blue line) periods. The shaded areas stand for the corresponding  $\pm 1\sigma$  standard  
 130 deviations.

131 S5. The observed temperature, start and end time of NPF, and the subsequent  
132 growth end time during NPF events

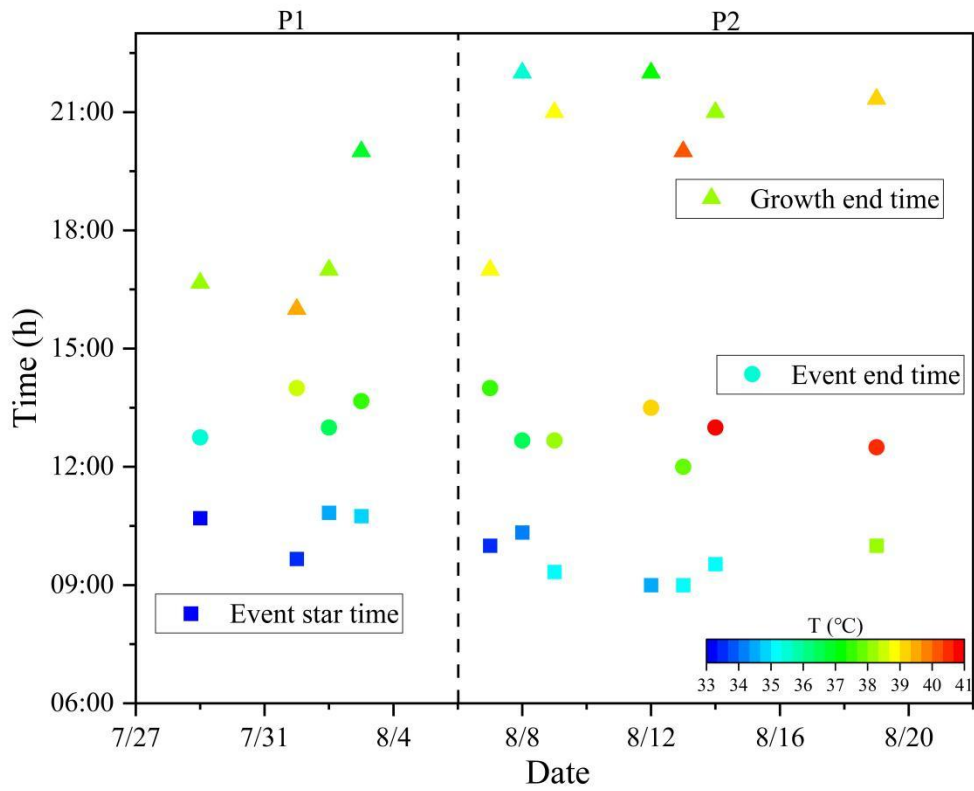

133 **Figure S5.** The start and end time of NPF, along with the subsequent growth end time  
134 and their corresponding temperature levels during NPF events.  
135

136 **S6. Diurnal variations of humidified nephelometer system related parameters on**  
 137 **non-event days during both P1 and P2 periods**

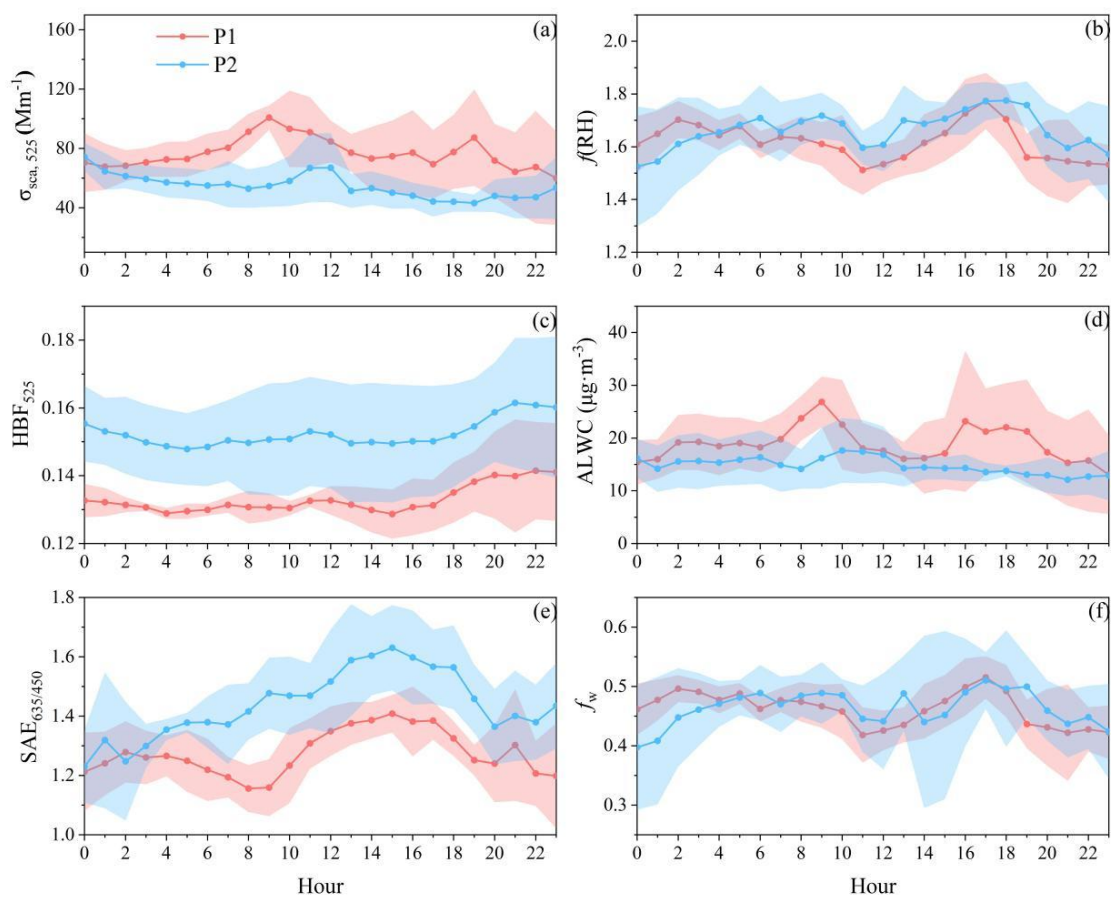

138 **Figure S6.** Diurnal variations of  $\sigma_{sca, 525}$  (a),  $f(RH)$  (b),  $HBF_{525}$  (c),  $ALWC$  (d),  $SAE_{635/450}$   
 139 (e) and  $f_w$  (f) on non-event days during P1 (red line) and P2 (blue line) periods. The  
 140 shaded areas stand for the corresponding  $\pm 1\sigma$  standard deviations.  
 141

142 **S7. Calculation of  $\sigma_{\text{sca}, 525}$  with the Mie theory and measured PNSD**

143 Based on the Mie theory and measured PNSD, the  $\sigma_{\text{sca}}$  and  $\sigma_{\text{bsca}}$  for  $\lambda = 525$  nm and  
144 a fixed refractive index of  $1.53 + 0.1i$  were calculated, with good agreements between the  
145 theoretically calculated and measured values ( $R^2 = 0.99$  for  $\sigma_{\text{sca}, 525}$ ;  $R^2 = 0.98$  for  $\sigma_{\text{bsca}, 525}$ ).  
146 The size-dependent  $\sigma_{\text{sca}}$ ,  $\sigma_{\text{bsca}}$  and HBF efficiencies simulated from Mie theory are shown  
147 in Figure S7. A good correlation between SMPS-determined particle volume  
148 concentration and the measured  $\sigma_{\text{sca}, 525}$  is also observed in Figure S8. The size-resolved  
149  $\sigma_{\text{sca}, 525}$  distributions and size-resolved  $\sigma_{\text{sca}, 525}$  cumulative frequency distribution on NPF  
150 event (non-event) days during P1 and P2 periods are displayed in Figure S9.

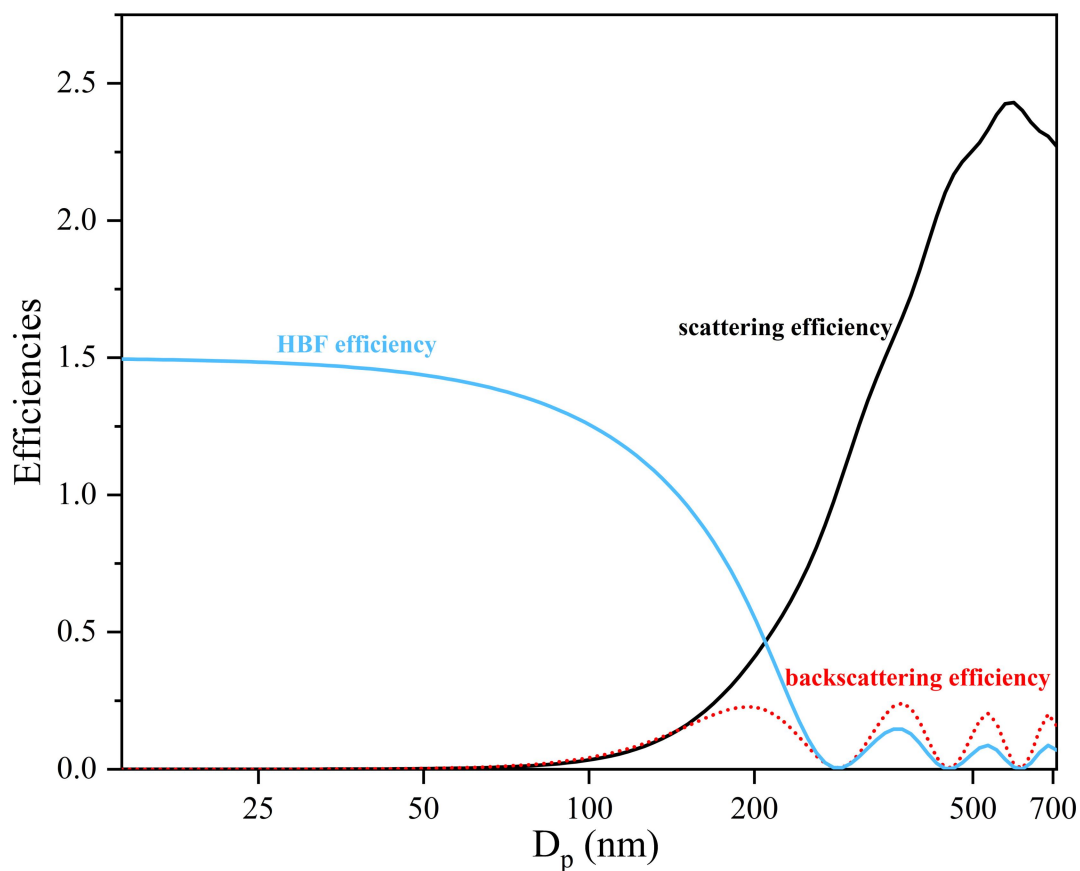

151 **Figure S7.** Size-dependent light scattering (the black line), backscattering (dashed red  
152 line) and HBF (the blue line) efficiencies simulated from Mie theory for the case of  $\lambda =$   
153 525 nm and refractive index of  $1.53 + 0.1i$ .  
154

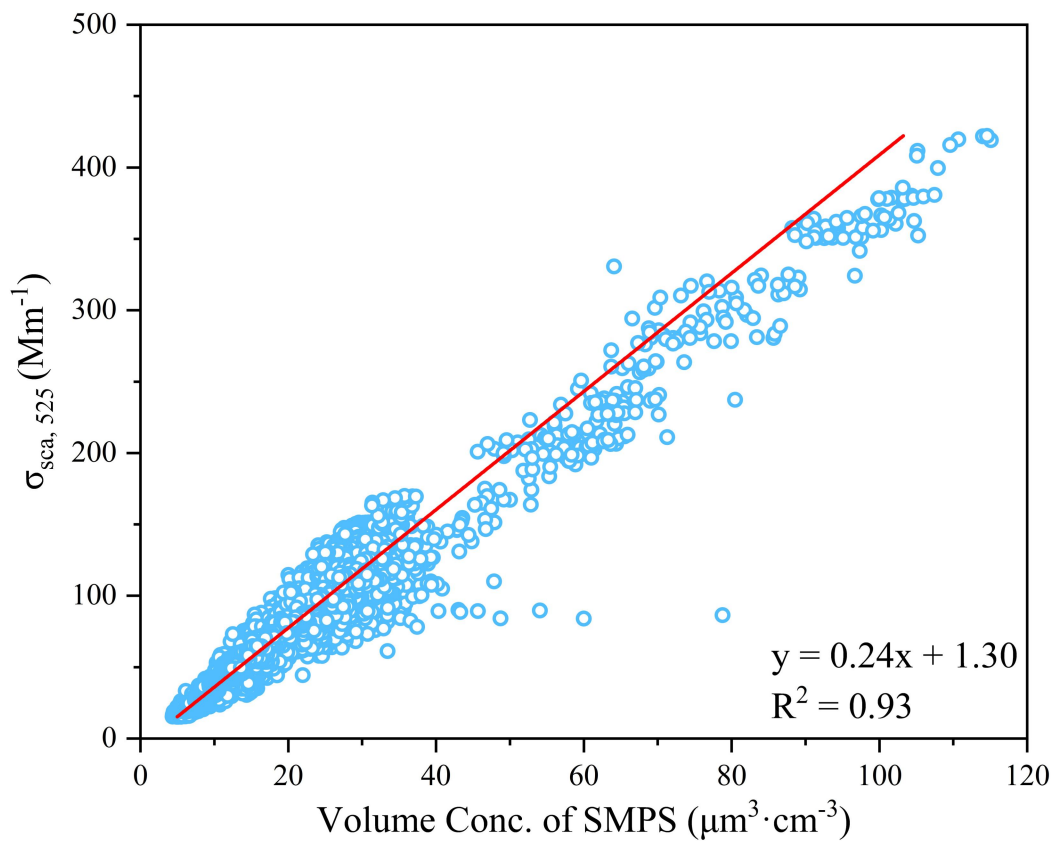

155

156 **Figure S8.** Correlation between the particle volume concentration determined by SMPS  
157 and  $\sigma_{\text{sca}, 525}$  measured by the humidified nephelometer system during the study period.

158 The solid line represents the fitting line.

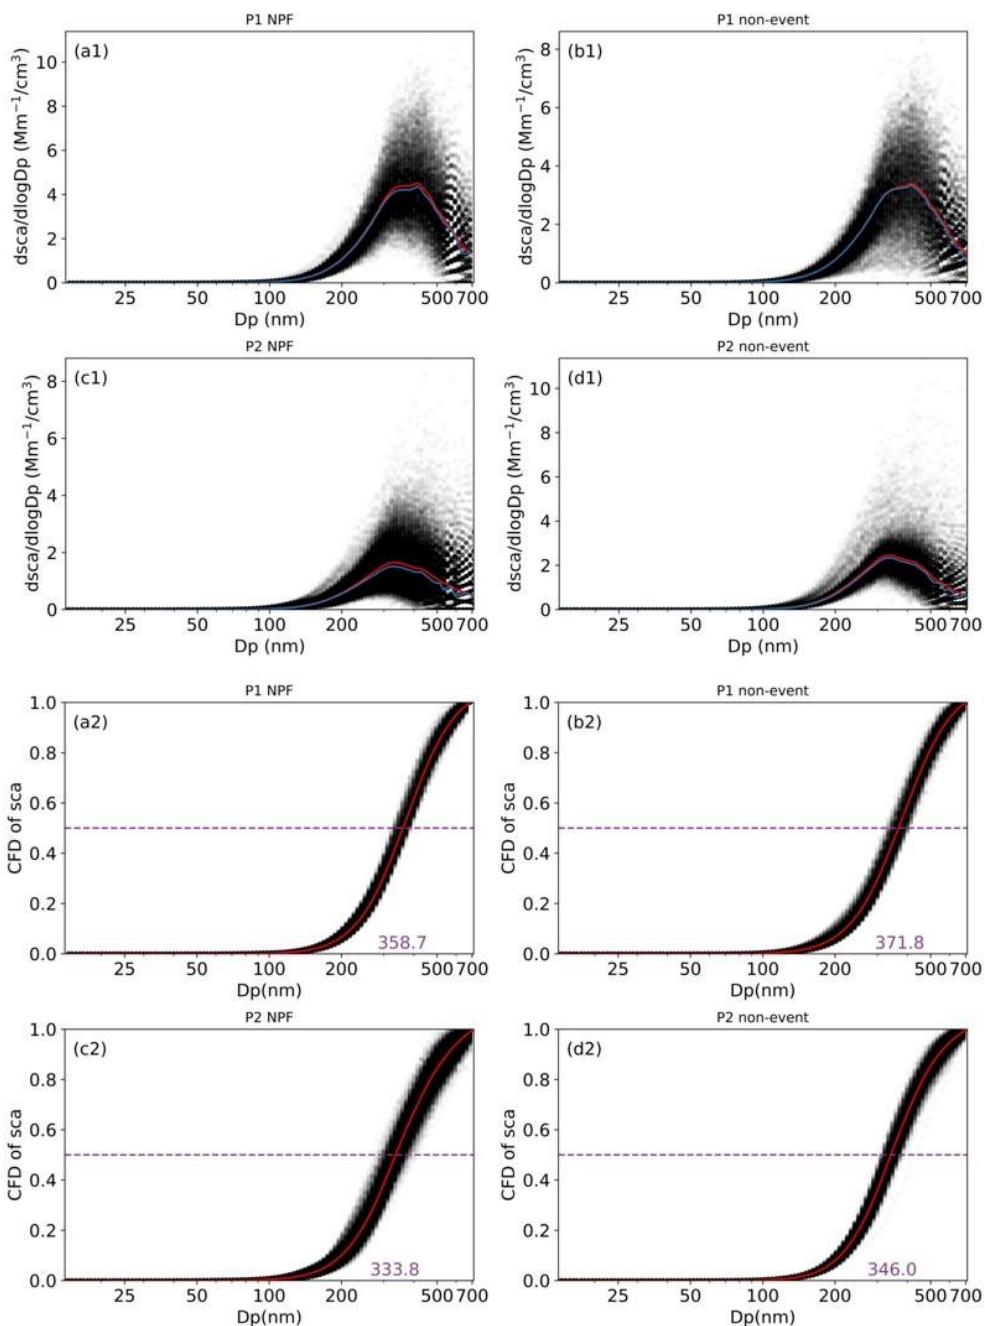

159

160 **Figure S9.** The size-resolved  $\sigma_{sca, 525}$  distributions **(a1-d1)** and size-resolved  $\sigma_{sca, 525}$   
 161 cumulative frequency distribution **(a2-d2)** for different event categories. The red and blue  
 162 lines represent the mean and median values, the purple dashed line and the purple  
 163 numbers on the abscissa represent the 50% cumulative frequency and the corresponding  
 164 particle size ( $D_{50}$ ), respectively.

165 **S8. Correlation coefficients between different PNSD-related parameters,**  
 166 **temperature, O<sub>3</sub>/O<sub>x</sub>, aerosol optical and hygroscopic properties on NPF (non-event)**  
 167 **days during either P1 or P2 period**

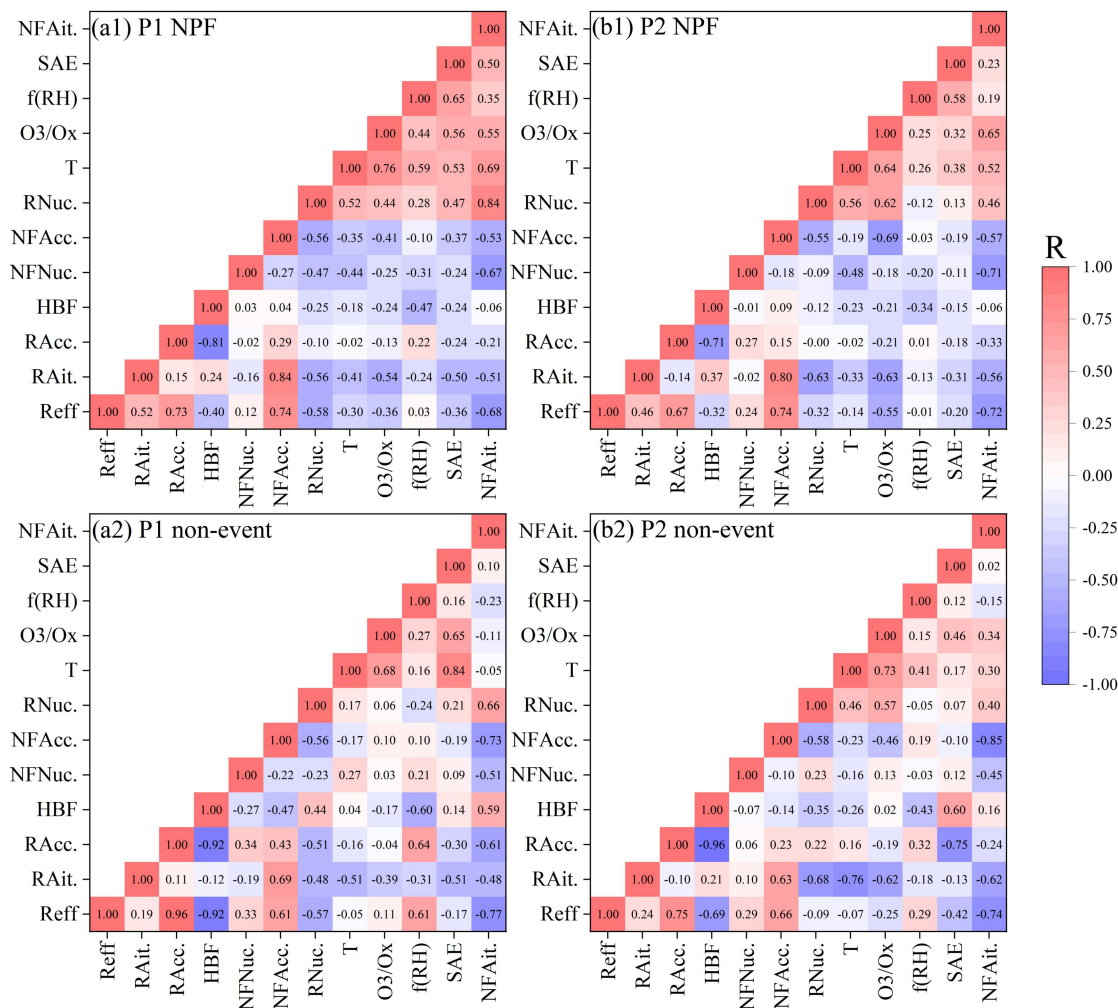

168 **Figure S10.** Correlation coefficients between different PNSD-related parameters (Reff,  
 169 RNuc., RAit, RAcc, NFNuc, NFAit, NFAcc.), temperature (T), O<sub>3</sub>/O<sub>x</sub>, HBF, SAE, and f(RH)  
 170 during NPF events (a1, b1) and non-event days (a2, b2) over the 08:00-22:00 time  
 171 window.  
 172

173 **S9. The relationship among  $f(\text{RH})$ ,  $R_{\text{eff}}$ , and  $\text{VF}_{\text{Acc.}}$  on P1 and P2 NPF days, as well as**  
 174 **the relationship among  $f(\text{RH})$ ,  $\text{SAE}_{635/450}$  and temperature on P1 and P2 non-event**  
 175 **days**

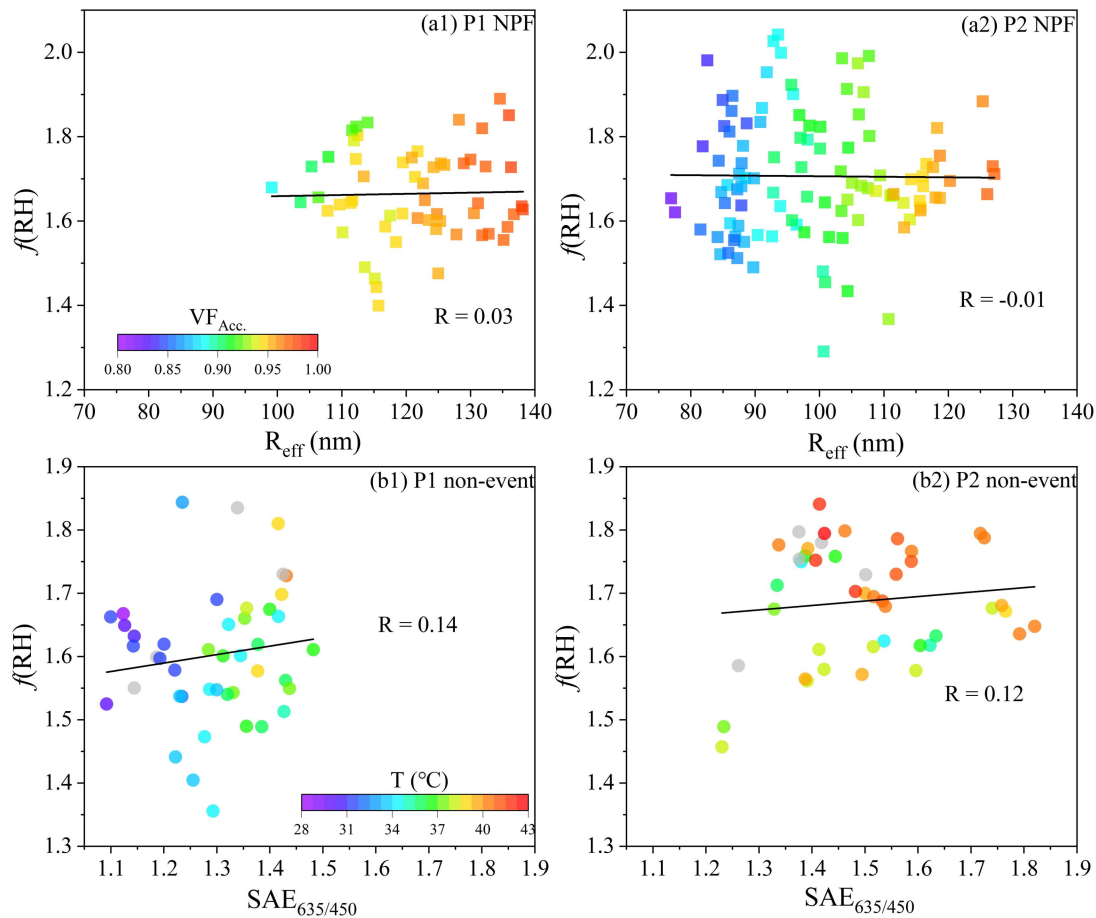

176

177 **Figure S11. (a1-a2)** The relationship among  $f(\text{RH})$  and  $R_{\text{eff}}$ , as well as the  $\text{VF}_{\text{Acc.}}$  (as  
 178 indicated by the color bar) on P1 and P2 NPF days during the 08:00-22:00 time window.  
 179 **(b1-b2)** The corresponding relationship among  $f(\text{RH})$  and  $\text{SAE}_{635/450}$ , as well as  
 180 temperature (as denoted by the color bar) for non-event cases.



181 **Table S1.** Specific dates for different event categories during P1 and P2 periods.

| Period | Category  | Date                 |
|--------|-----------|----------------------|
| P1     | NPF       | 7.29, 8.1-3          |
|        | non-event | 8.4-6                |
|        | Undefined | 7.30-31              |
| P2     | NPF       | 8.7-9, 8.12-14, 8.19 |
|        | non-event | 8.11, 8.15-16        |
|        | Undefined | 8.10, 8.17-18        |

182

183 **Table S2.** A summary (avg.  $\pm$  std.) of humidified nephelometer system determined parameters ( $\sigma_{\text{sca}, 525}$ ,  $f(\text{RH})$ , ALWC,  $\text{HBF}_{525}$ ,  
184  $\text{SAE}_{634/450}$ ,  $f_w$ ), SMPS-relevant parameters ( $N_{\text{conc.}}$ ,  $V_{\text{conc.}}$ ,  $R_{\text{eff}}$ ,  $\text{NF}_{\text{Acc.}}$ ,  $\text{VF}_{\text{Acc.}}$ ), meteorological parameters (T, RH, WS, VIS, MLH), air  
185 pollutants ( $\text{PM}_{2.5}$ ,  $\text{NO}_2$ ,  $\text{SO}_2$ ,  $\text{O}_3$ , CO,  $\text{O}_3/\text{O}_X$ ), NPF events related parameters (GR, CS, CoagS),  $\text{HBF}_{525, \text{RH}}/\text{HBF}_{525}$  and  $f_{\text{RF}}(\text{RH})$  on  
186 NPF event and non-event days, as well as overall mean levels during P1 and P2 periods.

|                                                           | NPF                |                    | non-event          |                    | Overall            |                    |
|-----------------------------------------------------------|--------------------|--------------------|--------------------|--------------------|--------------------|--------------------|
|                                                           | P1                 | P2                 | P1                 | P2                 | P1                 | P2                 |
| $\sigma_{\text{sca}, 525}$ ( $\text{Mm}^{-1}$ )           | $103.8 \pm 30.4$   | $33.2 \pm 11.7$    | $76.7 \pm 23.5$    | $54.7 \pm 17.6$    | $88.0 \pm 29.3$    | $41.2 \pm 16.0$    |
| $f(\text{RH})$                                            | $1.6 \pm 0.1$      | $1.7 \pm 0.2$      | $1.6 \pm 0.1$      | $1.7 \pm 0.1$      | $1.6 \pm 0.1$      | $1.7 \pm 0.2$      |
| ALWC ( $\mu\text{g}\cdot\text{m}^{-3}$ )                  | $25.9 \pm 6.6$     | $10.2 \pm 3.2$     | $18.9 \pm 7.5$     | $14.8 \pm 4.5$     | $21.4 \pm 7.8$     | $12.0 \pm 3.9$     |
| $\text{HBF}_{525}$                                        | $0.13 \pm 0.01$    | $0.16 \pm 0.01$    | $0.13 \pm 0.01$    | $0.15 \pm 0.02$    | $0.14 \pm 0.01$    | $0.15 \pm 0.01$    |
| $\text{SAE}_{635/450}$                                    | $1.3 \pm 0.1$      | $1.5 \pm 0.2$      | $1.3 \pm 0.1$      | $1.4 \pm 0.2$      | $1.3 \pm 0.1$      | $1.5 \pm 0.2$      |
| $f_w$                                                     | $0.47 \pm 0.04$    | $0.48 \pm 0.05$    | $0.46 \pm 0.04$    | $0.46 \pm 0.06$    | $0.46 \pm 0.05$    | $0.48 \pm 0.05$    |
| $N_{\text{conc.}}$ ( $10^4\#\cdot\text{cm}^{-3}$ )        | $1.4 \pm 0.7$      | $1.2 \pm 0.6$      | $0.9 \pm 0.3$      | $0.9 \pm 0.3$      | $1.2 \pm 0.6$      | $1.0 \pm 0.6$      |
| $V_{\text{conc.}}$ ( $\mu\text{m}^3\cdot\text{cm}^{-3}$ ) | $22.5 \pm 5.5$     | $10.1 \pm 3.6$     | $17.0 \pm 4.8$     | $15.9 \pm 5.6$     | $19.5 \pm 6.0$     | $12.1 \pm 5.0$     |
| $R_{\text{eff}}$ (nm)                                     | $124.8 \pm 10.7$   | $102.8 \pm 12.4$   | $126.2 \pm 10.6$   | $118.6 \pm 11.4$   | $125.0 \pm 10.0$   | $110.6 \pm 13.7$   |
| $\text{NF}_{\text{ACC.}}$                                 | $0.28 \pm 0.11$    | $0.20 \pm 0.10$    | $0.28 \pm 0.06$    | $0.33 \pm 0.07$    | $0.28 \pm 0.09$    | $0.26 \pm 0.11$    |
| $\text{VF}_{\text{ACC.}}$                                 | $0.96 \pm 0.02$    | $0.91 \pm 0.04$    | $0.96 \pm 0.02$    | $0.96 \pm 0.02$    | $0.96 \pm 0.02$    | $0.93 \pm 0.04$    |
| T ( $^{\circ}\text{C}$ )                                  | $34.0 \pm 3.4$     | $36.8 \pm 3.1$     | $33.2 \pm 3.3$     | $37.6 \pm 2.7$     | $33.8 \pm 3.4$     | $37.3 \pm 3.0$     |
| RH (%)                                                    | $46.6 \pm 14.1$    | $34.7 \pm 9.1$     | $52.6 \pm 13.0$    | $34.0 \pm 7.5$     | $47.9 \pm 13.7$    | $33.5 \pm 8.5$     |
| WS (m/s)                                                  | $1.1 \pm 0.6$      | $1.8 \pm 1.0$      | $1.4 \pm 1.1$      | $1.6 \pm 0.9$      | $1.2 \pm 0.8$      | $1.8 \pm 1.0$      |
| VIS (km)                                                  | $23.3 \pm 6.3$     | $29.9 \pm 0.7$     | $25.7 \pm 5.1$     | $29.2 \pm 2.1$     | $25.0 \pm 5.6$     | $29.8 \pm 1.2$     |
| MLH (m)                                                   | $1062.0 \pm 475.6$ | $1461.3 \pm 529.9$ | $1075.6 \pm 415.4$ | $1340.8 \pm 589.8$ | $1063.3 \pm 465.8$ | $1454.8 \pm 562.6$ |
| $\text{PM}_{2.5}$ ( $\mu\text{g}\cdot\text{m}^{-3}$ )     | $18.3 \pm 6.2$     | $9.3 \pm 4.5$      | $10.5 \pm 4.2$     | $11.8 \pm 4.0$     | $15.1 \pm 6.6$     | $10.1 \pm 4.4$     |

|                                            |                            |                            |             |             |              |             |
|--------------------------------------------|----------------------------|----------------------------|-------------|-------------|--------------|-------------|
| NO <sub>2</sub> (μg·m <sup>-3</sup> )      | 30.8 ± 18.7                | 22.7 ± 12.8                | 21.7 ± 9.6  | 33.4 ± 19.2 | 29.8 ± 19.1  | 24.8 ± 15.4 |
| SO <sub>2</sub> (μg·m <sup>-3</sup> )      | 7.2 ± 1.8                  | 8.8 ± 2.3                  | 6.4 ± 1.5   | 9.6 ± 3.9   | 6.9 ± 1.8    | 9.0 ± 3.0   |
| O <sub>3</sub> (μg·m <sup>-3</sup> )       | 108.2 ± 62.2               | 84.1 ± 50.2                | 98.7 ± 51.9 | 82.3 ± 58.3 | 100.2 ± 61.1 | 82.5 ± 49.5 |
| CO (mg·m <sup>-3</sup> )                   | 0.57 ± 0.10                | 0.44 ± 0.09                | 0.53 ± 0.05 | 0.51 ± 0.10 | 0.55 ± 0.10  | 0.45 ± 0.09 |
| O <sub>3</sub> /O <sub>X</sub>             | 0.71 ± 0.24                | 0.72 ± 0.21                | 0.78 ± 0.14 | 0.62 ± 0.27 | 0.70 ± 0.25  | 0.70 ± 0.22 |
| GR (nm·h <sup>-1</sup> )                   | 13.7 ± 3.4                 | 9.3 ± 3.2                  | /           | /           | /            | /           |
| CS (s <sup>-1</sup> )                      | 2.3 ± 0.4×10 <sup>-2</sup> | 1.3 ± 0.3×10 <sup>-2</sup> | /           | /           | /            | /           |
| CoagS (s <sup>-1</sup> )                   | 1.3 ± 0.2×10 <sup>-4</sup> | 0.9 ± 0.2×10 <sup>-4</sup> | /           | /           | /            | /           |
| HBF <sub>525, RH</sub> /HBF <sub>525</sub> | 1.2 ± 0.1                  | 1.8 ± 0.3                  | 1.4 ± 0.2   | 1.4 ± 0.2   | 1.3 ± 0.2    | 1.6 ± 0.3   |
| f <sub>RF</sub> (RH)                       | 1.9 ± 0.2                  | 2.2 ± 0.2                  | 1.9 ± 0.1   | 2.0 ± 0.2   | 1.9 ± 0.2    | 2.1 ± 0.2   |

188 **References**

189 Castro, L. M., Pio, C. A., Harrison, R. M., and Smith, D. J. T.: Carbonaceous aerosol in  
190 urban and rural European atmospheres: Estimation of secondary organic carbon  
191 concentrations, *Atmos. Environ.*, 33, 2771–2781, [https://doi.org/10.1016/S1352-](https://doi.org/10.1016/S1352-2310(98)00331-8)  
192 2310(98)00331-8, 1999.

193 Chow, J. C., Watson, J. G., Chen, L. W. A., Chang, M. C. O., Robinson, N. F., Trimble,  
194 D., and Kohl, S.: The IMPROVE\_A temperature protocol for thermal/optical carbon  
195 analysis: Maintaining consistency with a long-term database, *J. Air Waste Manag. Assoc.*,  
196 57, 1014–1023, <https://doi.org/10.3155/1047-3289.57.9.1014>, 2007.

197 Chow, J. C., Watson, J. G., Robles, J., Wang, X., Chen, L. W. A., Trimble, D. L., Kohl, S.  
198 D., Tropp, R. J., and Fung, K. K.: Quality assurance and quality control for  
199 thermal/optical analysis of aerosol samples for organic and elemental carbon, *Anal.*  
200 *Bioanal. Chem.*, 401, 3141–3152, <https://doi.org/10.1007/s00216-011-5103-3>, 2011.

201 Dominick, D., Wilson, S. R., Paton-Walsh, C., Humphries, R., Guérette, E. A., Keywood,  
202 M., Kubistin, D., and Marwick, B.: Characteristics of airborne particle number size  
203 distributions in a coastal-urban environment, *Atmos. Environ.*, 186, 256–265,  
204 <https://doi.org/10.1016/j.atmosenv.2018.05.031>, 2018.

205 Fitsiou, E., Pulido, T., Campisi, J., Alimirah, F., and Demaria, M.: Cellular Senescence  
206 and the Senescence-Associated Secretory Phenotype as Drivers of Skin Photoaging, *J.*  
207 *Invest. Dermatol.*, 141, 1119–1126, <https://doi.org/10.1016/j.jid.2020.09.031>, 2021.

208 Grainger, R. G., Lambert, A., Rodgers, C. D., Taylor, F. W., and Deshler, T.:  
209 Stratospheric aerosol effective radius, surface area and volume estimated from infrared  
210 measurements, *J. Geophys. Res.*, 100, <https://doi.org/10.1029/95jd00988>, 1995.

211 Hansen, J. E. and Travis, L. D.: Light scattering in planetary atmospheres, *Space Sci.*  
212 *Rev.*, 16, 527–610, <https://doi.org/10.1007/BF00168069>, 1974.

213 Hao, Y., Gou, Y., Wang, Z., Huang, W., Wan, F., Tian, M., and Chen, J.: Current  
214 challenges in the visibility improvement of urban Chongqing in Southwest China: From

215 the perspective of PM<sub>2.5</sub>-bound water uptake property over 2015–2021, *Atmos. Res.*,  
216 300, 107215, <https://doi.org/10.1016/j.atmosres.2023.107215>, 2024.

217 Kuang, Y., He, Y., Xu, W., Zhao, P., Cheng, Y., Zhao, G., Tao, J., Ma, N., Su, H., Zhang,  
218 Y., Sun, J., Cheng, P., Yang, W., Zhang, S., Wu, C., Sun, Y., and Zhao, C.: Distinct  
219 diurnal variation in organic aerosol hygroscopicity and its relationship with oxygenated  
220 organic aerosol, *Atmos. Chem. Phys.*, 20, 865–880, [https://doi.org/10.5194/acp-20-865-](https://doi.org/10.5194/acp-20-865-2020)  
221 2020, 2020.

222 Kuang, Y., Zhao, C. S., Zhao, G., Tao, J. C., Xu, W., Ma, N., and Bian, Y. X.: A novel  
223 method for calculating ambient aerosol liquid water content based on measurements of a  
224 humidified nephelometer system, *Atmos. Meas. Tech.*, 11, 2967–2982,  
225 <https://doi.org/10.5194/amt-11-2967-2018>, 2018.

226 Kuang, Y., Zhao, C., Tao, J., Bian, Y., Ma, N., and Zhao, G.: A novel method for  
227 deriving the aerosol hygroscopicity parameter based only on measurements from a  
228 humidified nephelometer system, *Atmos. Chem. Phys.*, 17, 6651–6662,  
229 <https://doi.org/10.5194/acp-17-6651-2017>, 2017.

230 Kulmala, M., Petäjä, T., Nieminen, T., Sipilä, M., Manninen, H. E., Lehtipalo, K., Dal  
231 Maso, M., Aalto, P. P., Junninen, H., Paasonen, P., Riipinen, I., Lehtinen, K. E. J.,  
232 Laaksonen, A., and Kerminen, V. M.: Measurement of the nucleation of atmospheric  
233 aerosol particles, *Nat. Protoc.*, 7, 1651–1667, <https://doi.org/10.1038/nprot.2012.091>,  
234 2012.

235 Lu, Y., Yan, C., Fu, Y., Chen, Y., Liu, Y., Yang, G., Wang, Y., Bianchi, F., Chu, B.,  
236 Zhou, Y., Yin, R., Baalbaki, R., Garmash, O., Deng, C., Wang, W., Liu, Y., Petäjä, T.,  
237 Kerminen, V. M., Jiang, J., Kulmala, M., and Wang, L.: A proxy for atmospheric daytime  
238 gaseous sulfuric acid concentration in urban Beijing, *Atmos. Chem. Phys.*, 19, 1971–  
239 1983, [https://doi.org/10.5194/acp-19-1971-](https://doi.org/10.5194/acp-19-1971-2019)2019, 2019.

240 Peng, C., Tian, M., Chen, Y., Wang, H., Zhang, L., Shi, G., Liu, Y., Yang, F., and Zhai,  
241 C.: Characteristics, formation mechanisms and potential transport pathways of PM<sub>2.5</sub> at a

242 rural background site in Chongqing, Southwest China, *Aerosol Air Qual. Res.*, 19, 1980–  
243 1992, <https://doi.org/10.4209/aaqr.2019.01.0010>, 2019.

244 Peng, C., Tian, M., Wang, X., Yang, F., Shi, G., Huang, R. J., Yao, X., Wang, Q., Zhai,  
245 C., Zhang, S., Qian, R., Cao, J., and Chen, Y.: Light absorption of brown carbon in  
246 PM<sub>2.5</sub> in the Three Gorges Reservoir region, southwestern China: Implications of  
247 biomass burning and secondary formation, *Atmos. Environ.*, 229, 117409,  
248 <https://doi.org/10.1016/j.atmosenv.2020.117409>, 2020.

249 Rissler, J., Vestin, A., Swietlicki, E., Fisch, G., Zhou, J., Artaxo, P., and Andreae, M. O.:  
250 Size distribution and hygroscopic properties of aerosol particles from dry-season biomass  
251 burning in Amazonia, *Atmos. Chem. Phys.*, 6, 471–491, [https://doi.org/10.5194/acp-6-](https://doi.org/10.5194/acp-6-471-2006)  
252 471-2006, 2006.

253 Strader, R., Lurmann, F., and Pandis, S. N.: Evaluation of secondary organic aerosol  
254 formation in winter, *Atmos. Environ.*, 33, 4849–4863, [https://doi.org/10.1016/S1352-](https://doi.org/10.1016/S1352-2310(99)00310-6)  
255 2310(99)00310-6, 1999.

256 Wan, F., Hao, Y., Huang, W., Wang, X., Tian, M., and Chen, J.: Hindered visibility  
257 improvement despite marked reduction in anthropogenic emissions in a megacity of  
258 southwestern China: An interplay between enhanced secondary inorganics formation and  
259 hygroscopic growth at prevailing high RH conditions, *Sci. Total Environ.*, 895, 165114,  
260 <https://doi.org/10.1016/j.scitotenv.2023.165114>, 2023.

261 Wang, H., Tian, M., Chen, Y., Shi, G., Liu, Y., Yang, F., Zhang, L., Deng, L., Yu, J.,  
262 Peng, C., and Cao, X.: Seasonal characteristics, formation mechanisms and source origins  
263 of PM<sub>2.5</sub> in two megacities in Sichuan Basin, China, *Atmos. Chem. Phys.*, 18, 865–881,  
264 <https://doi.org/10.5194/acp-18-865-2018>, 2018.

265 Xu, W., Kuang, Y., Bian, Y., Liu, L., Li, F., Wang, Y., Xue, B., Luo, B., Huang, S., Yuan,  
266 B., Zhao, P., and Shao, M.: Current Challenges in Visibility Improvement in Southern  
267 China, *Environ. Sci. Technol. Lett.*, 7, 395–401,  
268 <https://doi.org/10.1021/acs.estlett.0c00274>, 2020.

269 Xue, B., Kuang, Y., Xu, W., and Zhao, P.: Joint increase of aerosol scattering efficiency  
270 and aerosol hygroscopicity aggravate visibility impairment in the North China Plain, *Sci.*  
271 *Total Environ.*, 839, 141163, <https://doi.org/10.1016/j.scitotenv.2022.156279>, 2022.

272 Zhu, Y., Shen, Y., Li, K., Meng, H., Sun, Y., Yao, X., Gao, H., Xue, L., and Wang, W.:  
273 Investigation of Particle Number Concentrations and New Particle Formation With  
274 Largely Reduced Air Pollutant Emissions at a Coastal Semi-Urban Site in Northern  
275 China, *J. Geophys. Res. Atmos.*, 126, 1–20, <https://doi.org/10.1029/2021JD035419>, 2021.
